# Supplementary material for: Seasonal Variations in the Biodiversity, Ecological Strategy, and Specialization of Diatoms and Copepods in a Coastal System With Phaeocystis Blooms: The Key Role of Trait Trade-Offs
Source: Frontiers journal article supplement (doi:10.3389/fmars.2021.656300), 2021-09-06
Supplement: Data_Sheet_1.xlsx [file Data_Sheet_1.xlsx]

## Sheet: label.diatoms
Abbreviation	Diatom species
Act	Actinoptychus spp.
Agla	Asterionellopsis glacialis
Talt	Trigonium alternans
Bbro	Brockmaniella brockmanii/plagiogrammopsis
Bhya	Bacteriastrum hyalinum
Bpax	Bacillaria paxillifera
Cclo	Ceratoneis closterium
ccom	Chaetoceros compressus/tortissimus
Ccon	Coscinodiscus concinnus
Ccry	Corethron criophilum
Ccur	Chaetoceros curvisetus/pseudo-curvisetus/debilis
Cdan	Chaetoceros danicus
Cdec	Chaetoceros decipiens
Cden	Chaetocerosdensus/eibenii
Cdia	Chaetoceros diadema
Cdid	Chaetoceros didymus
Cpel	Cerataulina pelagica
Crad	Coscinodiscus radiatus
Csoc	Chaetoceros socialis
Cwai	Coscinodiscus wailesii
Cwig	Chaetoceros wighamii/perpusillus
Dbri	Ditylum brightwellii
Pdel	Pseudonitzschia delicatissima complex
Dfra	Dactyliosolen fragilissimus
Dipl	Diploneis spp.
Dsur	Delphineis surirella
Ezod	Eucampia zodiacus/bicornata
Gdel	Guinardia delicatula
Gfla	Guinardia flaccida
Gstri	Guinardia striata
Lann	Lauderia annulata
Ldan	Leptocylindrus danicus
Lmin	Leptocylindrus minimus
Navi	Navicula spp.
Nlon	Nitzschia longissima
Tmob	Trieres mobiliensis
Treg	Trieres regia
Brho	Biddulphia rhombus
Osin	Odontella sinensis
Pame	Pseudonitzschia americana
Pfra	Pseudonitzschia fraudulenta
Pleu	Pleurosigma spp./Gyrosygma spp.
Ppu	Pseudonitzschia pungens
Pstel	Podosira stelligera
Psub	Pseudonitzschia subpacifica
Pother	Psudonitzschia other
Psul	Paralia sulcata
Ramp	Raphoneis amphiceros
Rimb	Rhizosolenia imbricata var. shrubsolei
Rpun	Rhizosolenia setigera f. pungens
Nrob	Neocalyptrella robusta
Rset	Rhizosolenia setigera
Ske	Skeletonema spp.
Htam	Helicotheca tamesis
Meu	Meuneria membranacea
Tcon	Thalassiosira constricta
Tlev	Thalassiosira levanderi
Tnit	Thalassionema nitzschioides
Tnor	Thalassiosira nordenskioeldii
Tpun	Thalassiosira punctigera
Tang	Thalassiosira angulata/curviseriata
Tgra	Thalassiosira gravida
Thsp	Thalassiosira spp.
