# Supplementary material for: Seasonal Variations in the Biodiversity, Ecological Strategy, and Specialization of Diatoms and Copepods in a Coastal System With Phaeocystis Blooms: The Key Role of Trait Trade-Offs
Source: Frontiers journal article supplement (doi:10.3389/fmars.2021.656300), 2021-09-06
Supplement: Data_Sheet_2.xlsx [file Data_Sheet_2.xlsx]

## Sheet: diatoms
µgC.L-1	Act	Agla	Talt	Bbro	Bhya	Bpax	Cclo	ccom	Ccon	Ccry	Ccur	Cdan	Cdec	Cden	Cdia	Cdid	Cpel	Crad	Csoc	Cwai	Cwig	Dbri	Pdel	Dfra	Dipl	Dsur	Ezod	Gdel	Gfla	Gstri	Lann	Ldan	Lmin	Navi	Nlon	Tmob	Treg	Brho	Osin	Pame	Pfra	Pleu	Ppu	Pstel	Psub	Pother	Psul	Ramp	Rimb
2007-01-22	0	0	0	0.11028434209151	0	0.412783671390098	0.0211070723061119	0	0	0	0	0	0	0	0	0	0	0	0.00361510782111537	0	0	0.494014840590439	0	0	0	0	0	7.18921097622642	0	0	0	0	0	0.0883977597820234	0	0	0	0.535771978384378	0	0	0.0375975885906711	0.723835701736322	0	0	0	0	0.0734093275866871	0.0519662352128644	0
2007-02-05	0.124354067636781	0.013212956078028	0	0.0295884820245517	0	0	0.00363915039760558	0	14.2794013352549	0	0	0	0	0	0	0	0	0	0	0	0	0.247007420295218	0	0	0	0	0	3.69795039589646	0	0	0	0	0	0.0117863679709365	2.0979734988267	0	0	3.21463187030629	5.73139050670334	0	0.0375975885906711	0	0	0	0	0	0.171288431035602	0.0173220784042882	0.0777212899450667
2007-02-19	0	0	0	0	0	0	0	0	28.55880267051	0	0	0.0103192943369542	0	0.122275656810343	0	0	0	1	0.0554316532571032	0	0	0	0	0	0	0	0	0.880678344587736	0	0	0	0	0	0.0294659199273414	0.565745662604957	0	0	0.535771978384378	0	0	0.0375975885906711	1.44767140347266	0	0	0	0	0.091761659483358	0	0
2007-03-13	0	0.44263402861394	0	0	0	0	0	0.137920529890362	0	0	0.0821128726923085	0.0722350603586802	0.896866569356044	0	0	0	0	0	0.0445863297937563	0	0	0.741022260885652	0	3.99840665779282	0	0	0	0.336994264510613	0	0	0	0	0	0	0.135543231665768	0	0	0	5.73139050670334	0	0.00939939714766777	0	0	0	0	0	0.103996547414472	0	0.194303224862669
2007-03-27	0	0	0	0	0	0	0.00145566015904222	0	0	0	0.923769817788466	0.0825543546956347	0.311953589341237	0	0	0	0	11.0000000000001	2.02325534388427	0	0	35.816075942807	0	5.04867639041468	0	0	0	0.336994264510613	0	0.22394944766442	26.5010175908897	0	0	0	0	0	0	0	5.73139050670334	0	0.0469969857383396	0	0.104360904866699	0	0	0	0.0244697758622287	0	6.60630964533072
2007-04-02	0	0.158555472936338	0	0	0	0	0	0	0	0	3.40768421673077	0	0	1.07602577993102	0	0	0	0	2.68723014702911	0	0	29.1468755948361	0	7.99681331558565	0	0	0	0	0	0	69.0509974887299	0	0	0.0235727359418728	0.0589318398546823	0	0	0	11.4627810134068	0.0554316532571032	8.00828636981298	0	0	0	0	0	0	0.207864940851461	26.5806811612132
2007-04-11	0	0	0	0	0	0	0.000727830079521103	0.0527343202521979	0	0	0.307923272596155	0	0	0	0	0	21.7230964234487	0	0.650719407800775	0	0	0	0	17.5865141418062	0	0	0	0.074887614335692	2.77952926117328	1.45567140981874	0	0	0	0	0	0	0	0	0	0	0.629759608893738	0	0	0	0	0	0.103996547414472	0	57.1251481096244
2007-04-17	0	0	0	0.10759448008928	0	0	0	0	0	0	0.5063627149359	0	0	0	0	0	0	0	0	0	0	0	0.295290855453914	0	0	0	0	0.224662843007076	0	0.447898895328836	0	0	0	0	0	0	0	0	0	0	0	0	0.00907486129275651	0	0	0	0	0	46.0110036474801
2007-05-02	0.0621770338183898	0.0462453462730978	0	0.0242087580200876	0	0	0	0	0	0	0.465306278589744	0	0	1.46730788172412	0	0	0	0	0.0144604312844617	0	0	0	0.200731424213054	0	0	0	0	0.898651372028308	37.0603901489772	0	0	0	0	0	0	0.301447197306102	0	1.07154395676875	0	0	0	0	0	0	0	0	0.373164081898992	0	74.2238318975384
2007-05-09	0	0.125523082741266	0	0.112974204093743	0	0	0.00727830079521108	0	0	0	0	0	0	0	0	0	0	0	0	0	0	1.48204452177132	2.69411432166942	1.5987151478689	0	0	0	1.84972407409159	10.1916072909687	0.447898895328836	0	0	0	0	0	0	0	2.67885989192188	45.8511240536273	0	0	1.44767140347266	9.19283448956235	0	0	0	0.403751301726771	0.138576627234307	165.546347582993
2007-05-15	0.124354067636781	14.2699595318801	0	0	0	0	0.0145493232896269	0	0	0	0	0	0	0.195641050896548	0	0	0	0	0.0192805750459488	30.0000000000001	0	1.97605936236176	8.78573241844903	0	5.03886582510225	0	0	69.5331499106899	46.325487686221	0.895797790657682	0	0.0103421300746817	0	0.0235727359418728	0	50.2361754310615	0	0	91.702248107254	0	0	0	3.04915339436616	0	0	0	0.293637310346748	0.242509097660033	103.68020078672
2007-05-24	0	1.32790208584181	0	0	0	0	0.00145566015904222	0	0	0	1.38223335698719	0.0206385886739086	0	0	0	0	0	0	0.127733809679412	0	0	0.494014840590439	12.7622053427357	0.077701829787067	0	0	0	6.9645481332194	0.926509753724428	4.25503950562393	0	0	0	0.0117863679709365	0	3.014471973061	0	0	0	0	0	0	0.69876431954225	0	0	0	0.0489395517244579	0	2.48708127824214
2007-05-31	0	1.6450130317145	0	0	0	0	0.00291132031808442	0.535456174868463	0	0	0	0.165108709391268	0	0.097820525448273	0	0	0	0	0.407302147845665	0	0	0	9.06111602522066	1.2794901304937	0	0	0	3.69682708168143	2.77952926117328	32.4726699113408	0	0	0	0.0235727359418728	0	0	0	0	11.4627810134068	0	0	0	0.0362994451710262	0	0	0	0.134583767242259	0.0346441568085766	3.88606449725338
2007-06-14	0	0	0	0	0	0	0	0.0486778340789519	0	0	0	0	0	0.293461576344824	0	0	0	0	4.81291354584499	0	0	0	0.0862647442899074	0	0	0	0	0.336994264510611	0	85.4367142839754	0	0.444711593211317	0	0.0235727359418728	0	0	0	0	0	0	0	0	0	3.03598752474168	0	0	0.110113991380029	0	4.66327739670408
2007-07-16	0	0.112310126663238	0	0	0	0	0.00145566015904222	0.0649037787719353	0	0	0	0	0	0.097820525448273	0	0	0	0	0	0	0	0	0	0	0	0	0	0	1.85301950744884	0	0	0	0	0.0117863679709365	0	0	0	0	0	0	0.0957029527762554	1.44767140347266	0.00659989912200467	0	0	0.00311722788266101	0.452690853451235	0	127.074309060187
2007-07-30	0	0.211407297248449	0	0	0	0	0.0189235820675487	0	0	0	3.61296639846153	0	0	0.538012889965508	0	0	0	0	0	0	0	0	0.0199072486822863	0	0	0	0	0	5.55905852234661	1.79159558131535	0	0.548132893958135	0.00240248812867991	0.0353591039128094	0	0	0	0	0	0	0.0478514763881269	5.79068561389064	0.00329994956100235	0	0	0.00155861394133051	0.489395517244578	0.0346441568085766	0.310885159780267
2007-08-30	0	0	0	0.129113376107136	0	0	0.0625933868388158	0	0	0	14.1781560182052	0.103192943369543	0	0.146730788172411	0	0	10.3016745925633	0	8.8088127241178	0	0	0.494014840590439	0	0	1.51241595550843	0	1.6140386698965	0	0	6.27058453460374	0	1.2513977390365	0.0488505919498248	0.0825045757965543	0	0	0	0	0	0	0.562254847560491	2.89534280694529	0.0387744073417775	0	0	0.0183137138106336	0.770797939660207	0.10393247042573	0.38860644972534
2007-09-12	0.124354067636781	0	0	0	0	0	0.0349358438170135	0	0	0	17.6405821500642	0.0825543546956347	0	1.71185919534481	0	0.61770580847877	0	0	0.0144604312844617	0	0	9.13927455092307	0	0	3.52897056285296	0	8.75493702762055	0.187219035839232	0	3.80714061029511	0	0.217184731568315	0.319530921114428	0.0117863679709365	0	0	0	0	11.4627810134068	0	6.16087758497133	2.89534280694529	0.424868505979058	0	0	0.2006715449463	1.50489121552706	0	19.0417160365413
2007-10-05	0	0	0	0	0	0	0.0058226406361689	0	0	0	0.102641090865385	0.0928736490325879	0	0	0	0	0.22394944766442	0	0	0	0	0.741022260885652	0.116955086008432	0	0.504138651836144	0	0	1.73739265258805	0	5.15083729628169	0	0.372316682688541	0	0	0	0	0	0	0	0	0	0	0	0	0	0	0.318107086208973	0.0346441568085766	0.0777212899450667
2007-10-11	0	0	0	0.0107594480089278	0	0	0.000727830079521103	0	0	0	0.164225745384616	0.515964716847717	0	0	0	0.0149444953664218	0	0	0	0	0	0.247007420295218	0	0	0.504138651836144	0	0.0489102627241369	4.11881878846305	0	8.95797790657681	0.876623991556156	0.0206842601493633	0.00280290281679324	0	0	0.502411995510162	0	0	0	0	0.075195177181343	0	0	0	0	0	1.27854578880145	0.0346441568085766	0
2007-10-25	0.683947372002291	0	0.238001665209065	0.169461306140616	0	0	0.013828771510901	0	0	0	0.786915029967952	0	0	0	0	0	0	0	0.00602517970185905	0	0	0	0	0	1.00827730367228	0	0	2.62106650174921	0	0	0	0.00517106503734082	0.00320331750490656	0.0117863679709365	0.0648250238401505	0	0	0	0	0	0	0	0	0	0	0	2.42250781036064	0	0
2007-11-27	0	0	0	0.193670064160702	0	0	0.0232905625446754	0.137920529890362	0	0	0	0.0103192943369542	0	0	0	0	0	0	0	0	0	0	0	0	0.25206932591807	0	0	5.31702061783412	0	0	0	0	0	0.0294659199273414	0	0.502411995510162	0	0	0	0	0	2.17150710520896	0	0.37949844059271	0	0	1.29078067673256	0	0
2007-12-11	0	0	0	0	0	0	0.000727830079521103	0	0	0	0	0	0	0	0	0	0	0	0	0	0	0	0	0	0	0	0	5.99100914685535	0	0	0	0	0	0.00589318398546819	0	0	0	0.803657967576558	0	0	0	0	0	0	0	0	0.880911931040237	0	0
2007-12-21	0	0	0	0.0914553080758868	0	0	0.00291132031808442	0	0	0	0.0410564363461539	0	0	0	0	0	0	0	0.00482014376148717	0	0	0	0.0124420304264289	1.81304269503157	0	0	0	3.9690435597917	0	0	0	0	0	0.00589318398546819	0	0	0	0	0	0	0	2.17150710520896	0	0	0	0	0.776915383625765	0	0
2008-02-11	0	0	0	0	0	0	0.0181957519880276	0.74639345587726	0	0	0.123169309038461	0	0	0	0	0.034870489188318	0	0	0	0	0	1.72905194206654	0	0	0	0	0	5.20468919633058	0	0	0	0	0	0	0	0	0	0	0	0	0	0	0.0362994451710262	0	0	0	0.134583767242259	0	0
2008-02-21	0	0	0	0	0	0	0.00145566015904222	0	0	0	5.46050603403846	0.0825543546956347	0	0.195641050896548	0	0	0	1	0	0	0	50.6365211605201	0	0.362608539006313	0	0	0	4.86769493181997	0	0	20.9041105678772	0.0620527804480909	0	0	0	0	0	0	0	0	0	0	0.417443619466801	0	0	0	0.0734093275866871	0	0
2008-03-26	0	0.379872487243309	0	0	0	0	0	0	0	0	0	0	0	0	0	0	0	0.499999999999997	0	0	0	9.63328939151352	0.0456207782302395	0.621614638296536	0	0	0	127.713337488089	3.2427841380355	0.335924171496626	0	0	0	0	0.0412522878982777	0	0	0	0	0	0	0	0.181497225855131	0	0	0	0.0734093275866871	0	20.2075353857174
2008-04-08	0	0.832416232915765	0	0	0	0	0.0655047071569002	0	0	0	0	0	0	0	0.79479174546149	0	0	1.99999999999999	0.359100710230797	0	0	20.7486233047985	0.459525657082776	4.79161283686913	0	0	0	2.39640365874214	0.926509753724428	0.22394944766442	0	0	0	0	0	0	0	0	0	0	0	0	0.181497225855131	0	0	0	0.256932646553402	0.173220784042883	46.9436591268204
2008-04-21	0	0	0	0	0	0	0.00436698047712665	0	0	0	1.53431834460464	0	0	0.195641050896548	0	0.00996299691094799	0	0	1.61956830385971	0	0	1.48204452177132	0.0779700573389547	13.5978202127367	0	0	0	0	23.1627438431108	3.35924171496627	7.55245285032994	0.268895381941724	0.0144149287720796	0	0	0	0	0	0	0	0	0	0.762288348591545	0	0	0	0.391516413795661	0	1.08809805923093
2008-05-05	0	0	0	0	0	0	0.0058226406361689	0	0	0	0	0	0	0	0	0	0	1	0	0	0	1.48204452177132	0.0995362434114316	0	0.504138651836144	0	0	0.72960251373418	7.87533290665762	46.5814851141996	8.76623991556155	0.124105560896181	0	0	0	0	0	0	0	0	0	1.44767140347266	0.0362994451710262	0	0	0	0.0489395517244579	0.0346441568085766	132.981127096011
2008-05-22	0	0	0	0	0	0	0.00145566015904222	0	0	0	0	0	14.2718767123615	0	0.917067398609412	0	0	0	2.04856109863204	0	0	0	0.119443492093718	0	0	0	0.293461576344824	0.224662843007076	37.9868999027015	15.0046129935161	21.7133019446983	0.144789821045545	0.0192199050294394	0.0117863679709365	0	0	0	0	0	0.0024100718807436	0	0	2.64078463619213	0	0	0	0	0	14.6426910256508
2008-06-05	0	0	0	0	0	0	0.0160122617494645	0	0	0	0.725330375448723	0	0.467930384011857	0	0	0	0	1.99999999999999	2.84388481927743	0	0	0.988029681180871	0	0	0	0	0	0.936095179196143	17.1404304439018	11.8693207262143	0.269730458940352	0.0517106503734086	0.0184190756532128	0.0235727359418728	0	0	0	0	0	0.0698920845415648	0	1.44767140347266	0.208721809733401	0	0	0	0.110113991380029	0.207864940851461	130.338603237878
2008-07-01	0	0.0330323901950702	0	0	0	0	0.0506569735346693	0	0	0	2.95606341692311	0	1.16982596002963	0.929294991758591	2.75120219582827	0	0	0	24.2862943422533	0	0	0	0.0431323721449537	1.42453354609624	0	0	0	0.599100914685535	5.55905852234661	0	1.07892183576141	0	0	0	0	1.00482399102033	0	7.5008076973813	0	0.0988129471104877	0	3.47441136833436	1.59717558752515	0	0	0	0.122348879311144	0	185.691705936754
2008-07-20	0	0	0	0	0	0	0.00873396095425338	0	0	0	0.725330375448723	0	0.467930384011857	0	0	0	0.447898895328836	1.99999999999999	3.28492797345356	0	0	0.988029681180871	0	0.129503049645112	0	0	0	2.99550457342769	12.0446267984175	8.28612956358355	0	0.0517106503734086	0.0144149287720796	0.200368255505919	0	0	0	0	0	0.0313309344496666	0	1.44767140347266	0.181497225855131	0	0	0	0	0.207864940851461	108.965248502984
2008-09-15	0	0	0	0	0	0	0.0320245234989291	0	0	0	0	0	0	0	0	0	0	0	0.424172651010876	0	0	0.988029681180871	0	0	0	0	24.406221099344	2.24662843007078	0	0	0	0	0	0.0353591039128094	0	2.00964798204065	0	2.14308791353752	223.524229761431	0.713381276700109	0	0	0.0181497225855129	0	0	0	1.37030744828482	0.138576627234307	6.9949160950561
2008-10-29	0	0	0.238001665209065	0	0	0	0	0	0	0	0	0.0412771773478169	0	0.586923152689645	0	0	0	0	0.400071932203439	0	0.426582722891611	0.494014840590439	0.0364966225841916	0	0	0	0	9.73538986363991	0	0	0.134865229470177	0	0	0.0471454718837461	0.0117863679709365	1.00482399102033	0	0	0	0.00964028752297444	0	0	0.145197780684103	0	0	0	0.880911931040237	0	2.76687792204437
2008-12-15	0	0.277472077638591	0	0	0	0	0	0	0	0	0	0.0412771773478169	0	0	0	0	0	0	0.689280557892671	0	0	0	0	11.9142805673504	0	0	0	10.2596031639897	0	0	0.539460917880709	0	0	0	0.0117863679709365	0	0	0	0	0	0	0	0.0635240290492948	0	0	0	0.0856442155177999	0	22.9277805337949
2009-01-13	0	0	0	0	0	0	0.00436698047712665	0	0	2.71506352704357	0	0.598519071543353	0	0	0	0	0	0	1.84611506064959	0	0.183165462936512	0	0.0895826190702884	6.47515248225555	0	0	0	5.09235777482704	0	0.895797790657682	6.47353101456856	0	0	0	0.153222783622173	0	0	0	0	0.0313309344496666	0	2.89534280694529	0	0	0	0	0.207993094828944	0.10393247042573	13.2126192906615
2009-01-27	0	0.132129560780282	0	0	0	0	0.0116452812723377	0	0	0	0	0.412771773478174	0	0	0	0	0	0	0.144604312844617	0	0.159064744129076	3.45810388413303	0.145986490336766	0	0	0	0	0	0	2.23949447664419	3.23676550728427	0	0	0	0.153222783622173	0	0	0	0	0.016870503165205	0	5.79068561389064	0	0	0	0	0.0244697758622287	0.0692883136171527	21.1790515100309
2009-02-06	0	0.87205510114985	0	0	0	0	0.0160122617494645	0	0	10.8602541081743	0	1.36214685247796	0	0	0	0	0	0	0	0	1.21708629977552	15.3144600583036	0.610488959590114	0	0	0	0	5.01747016049135	0	0.895797790657682	1.21378706523158	0	0	0	0.330018303186221	0	10.6421649728321	0	0	0	0.319579503020705	1.44767140347266	0	0	0	0	0.171288431035602	0	9.63743995318826
2009-02-09	0	0.587976545472256	0	0	0	0	0.0291132031808445	0	0	0	0	3.3434513651732	0	0	0	0	0	0	0	0	2.25582728037603	10.3743116523992	1.680503576263	0	0	0	0	3.22016741643478	0	0	1.61838275364213	0	0	0	0.54217292666308	0	0	0	0	0	0.244384325839362	8.686028420836	0	0	0	0	0.134583767242259	0	1.24354063912108
2009-02-20	0	1.33450856388084	0	0	0	0	0.0218349023856331	0	0	0	0.123169309038461	8.8745931297806	0	0	0	0	15.0046129935161	1	0.122913665917925	0	4.94787757116655	24.7007420295217	5.03155710444787	0	0	0	0	0.599100914685535	0	0	9.03597037450183	0	0	0	0.188581887534982	0	0	0	0	0	0.394774680202048	1.44767140347266	0.0998234742203219	1.51799376237085	0	0	0.807502603453546	0	0.932655479340816
2009-02-25	0	2.29905435757688	0	0	0	0	0.0116452812723377	0	0	0	0.465306278589744	11.949742842193	0	0	0	0	31.5768721206831	0	0	0	2.49442439656965	102.26107200222	3.49206320635106	0	0	0	0	1.64752751538524	0	0.447898895328836	19.0159973552949	0	0	0	0.0825045757965543	2.00964798204065	0	1.07154395676875	0	0	1.22192162919683	2.89534280694529	0	0	0	0	0.146818655173374	0	1.08809805923093
2009-03-02	0	2.48876021812349	0	0	0	0	0.0141819621388809	0	0	0	1.59999110287291	12.1761591077238	0	0.105892160161097	0	0	61.5768585430774	0	0	0	0.198279312530491	252.147989260225	1.48873823605862	0.51801219858045	0	0	0	0.074887614335692	0	0	37.0823739199789	0	0	0	0.0893124189860552	0	0	0	0	0	1.50589791473088	1.5671256253702	0	0	0	0	0	0	2.77643657184902
2009-03-11	0	0.739925540369576	0	0	0	0	0.0262018828627602	0	0	0	0.670588460320513	7.20286744719404	0	7.53218045951713	0	0	0	1	0.296438841331459	0	0.0602517970185902	191.183743308498	0.0646985582174305	0.129503049645112	0	0	0	0	0	0	20.3646496499967	0	0	0	0.176795519564046	0	0	0	0	0	3.66576488759045	1.44767140347266	0	0	0	0	0.489395517244578	0.0346441568085766	6.76175222522083
2009-03-16	0	0	0	0	0	0	0.0058226406361689	0	0	0	0.136854787820512	3.88005467069476	0	0	0	0	0	0	0.207266181743951	0	0.012050359403718	52.8595879431767	0.0331787478038105	0.129503049645112	0	0	0	0.149775228671383	0	0	11.7332749639052	0	0	0	0.0117863679709365	0	0	0	0	0	0.883543331880773	1.44767140347266	0	0	0	0	0.061174439655572	0	5.751375455935
2009-03-30	0	0	0	0	0	0	0.00145566015904222	0	0	0	0.273709575641028	0.288940241434721	0	0	0	0	0	0	0.641079120277802	0	0	8.39825229003741	0.0132714991215242	0	0	0	0	0	0	0	0.134865229470177	0	0	0	0	0	0	0	0	0	0.770750566108764	1.44767140347266	0	0	0	0	0.0978791034489152	0	5.47935094112721
2009-04-07	0	0	0	0	0	0	0.00727830079521108	0	0	0	0	0	0	0.978205254482743	0	0	0	0	2.26064742413747	0	0	0.988029681180871	0.0298608730234295	0	0	0	0	0.299550457342769	0	0	0	0.134447690970862	0	0	0	0	0	0	0	0	0	0	0	0	0	0	0.293637310346748	0	16.5157741133268
2009-04-27	0	0	0	0.0161391720133919	0	0	0.0101896211132954	0	0	0	0	0	0	0	0	0	0	0	0.0144604312844617	0	0	0.988029681180871	1.97745336910711	0.129503049645112	0	0	0	6.59011006154088	0	0	0.134865229470177	0.0827370405974537	0	0	0.0589318398546823	0	0	0	0	0	0	1.44767140347266	0	0	0	0	0	0	35.6740720847857
2009-05-20	0	0	0	0	0	0	0	0.0567908064254428	0	0	0	0	0	0	0	0	0	0	0	0	0	0.494014840590439	0.285337231112771	0	0	0	0	2.09685320139937	0	0	0	2.98887559158299	0	0	0	0	0	0	0	0	0.00494705113035152	0	0.0429861850709518	0	0	0	0	0	110.908280751612
2009-06-09	0	0	0	0	0	0	0.00436698047712665	0.778845345263229	0	0	0	0	0	0.195641050896548	0	0	0	0	0	0	0	0	0.127738179044671	0.647515248225559	0	0	0	0.748876143356916	6.48556827607091	0	0	8.94594251459972	0.0544563975834112	0	0.165009151593111	0	0	0	0	0	0.106856304415593	0	0.928501597532553	0	0	0	0	0.346441568085764	114.366878154167
2009-06-25	0	0.0396388682340846	0	0	0	0	0.0131009414313799	0	0	0	0.164225745384616	0.0412771773478169	0	0.293461576344824	0.427964786017723	0	0	0	0.0506115094956154	0	0	0	0.754070405445451	0	0	0	0	3.89415594545597	8.80184266038198	7.39033177292575	0	1.89260980366675	0.141746799592113	0	0.294659199273413	0	0	0	0	0	0.0168199738431952	2.89534280694529	0.146153029241235	0	0	0	0.0978791034489152	0.0346441568085766	327.867261633263
2009-07-21	0	0.416208116457884	0	0.0215188960178559	0	0	0.0131009414313799	0	0	0	0.0273709575641024	0	0	0	0	0	0	0	0.0867625877067693	0	0.0144604312844617	0	0.0530859964860969	0	0	0.0329177388643862	0	0.898651372028302	8.80184266038198	1.34369668598653	0	5.43996041928258	0.00320331750490656	0	0.141436415651238	0	0	0	0	0	0.111803355545945	0	0.971487782603523	0	0	0	0	0.0692883136171527	55.889379599498
2009-08-24	0	0	0	0	0	0	0	0	0	0	0	0.412771773478174	0.467930384011857	0.146730788172411	0	0	0	0	0.0723021564223086	0	0.0337410063304105	0	0	0	0	0	0	2.92061695909196	8.80184266038198	254.630521994442	0	0.196500471418951	0	0	0	0	0	0	0	0	0.0306717170081789	0	0.266514347439901	0	0	0	0.464925741382344	0	41.5342573466436
2009-09-09	0	0	0	0	0	0	0.00436698047712665	0.0567908064254428	0	0	0	0.288940241434721	0.077988397335309	0.391282101793094	0	0	0	0	0.0072302156422308	0	0	0	0.00331787478038105	0	1.00827730367228	0.296259649779473	0	2.24662843007075	9.72835241410642	178.039810893215	0	0.0930791706721348	0.00240248812867991	0	0	0	0	0	0	0	0.0118729227128436	5.79068561389064	0.103166844170284	0	0	0	0.893146818971354	0	29.9537851448291
2009-09-21	0.124354067636781	0.105703648624224	0	0	0	0	0.00145566015904222	0.0567908064254428	0	0	0	1.46533979584752	33.2230572648415	0	0	0	0	0	0	0	0	10.3743116523992	0.00165893739019053	0	0.504138651836144	0.757107993880887	0	2.24662843007075	0	0	0	0	0.000800829376226638	0	0	0	0	0	0	0.000482014376148724	0.0617674669703882	1.44767140347266	0.134178306257186	0	0.0298174013904854	0.00234719837593226	0.599509508624607	0.0346441568085766	0
2009-10-21	0	0	0	0	0	4.12783671390103	0.00873396095425338	0	0	0	0.58847558762821	0.0206385886739086	0	0	0.0611378265739613	0.328778898061279	0	0	0.159064744129076	0	0	11.3623413335802	0.0182483112920958	0	0	10.4349232200103	3.22807733979301	1.7973027440566	0	0	1.21378706523158	0.361974552613864	0.458074403201636	0	0.0353591039128094	0	0	0	45.8511240536273	0.0530215813763597	0.225585531544029	1.44767140347266	0	0.37949844059271	0	0	0.856442155178012	0	0
2009-12-16	0.124354067636781	0.0726712584291548	0	0	0	0	0.0152844316699432	0	0	0	0.102641090865385	0.19606659240213	0	0	0	0	0	0	0.100017983050858	0	0	1.72905194206654	0	0	0	0	0	1.34797705804245	0	0	0.876623991556156	0.0103421300746817	0	0	0.00589318398546819	0	1.330270621604	0.535771978384378	0	0.584442431080322	0.075195177181343	0	0	0	0	0	0.220227982760062	0.190542862447171	0.854934189395739
2010-01-05	0	0.0264259121560563	0	0	0	0	0.0232905625446754	0	0	0	0.615846545192312	0.928736490325891	0	0	0	0.0597779814656884	0	1	4.34294952909999	0	0	121.527650785248	0	0.129503049645112	0	0	0	5.4293520393377	0	0.671848342993259	16.9930189132422	0	0	0	0	0	0	0	0	0.221726613028412	1.4287083664455	5.79068561389064	0	0.758996881185415	0	0	0.146818655173374	0.588950665745799	0
2010-01-18	0	0	0	0	0	0	0.00436698047712665	0	0	0	0.164225745384616	0.26830165276081	0	0	0	0	0	1	1.21708629977552	0	0	40.0152020878255	0	0.51801219858045	0	0	0	2.39640365874214	0	0	14.5654447827792	0	0	0	0	0	0	0.535771978384378	0	0.0530215813763597	1.4851047493315	2.89534280694529	0	1.89749220296355	0	0	0.0367046637933433	0	0
2010-02-03	0	0	0	0	0	0.0917297047533558	0.0262018828627602	0	28.55880267051	0	0	0.288940241434721	0	0.391282101793094	0	0	0	0	22.8506988754101	0	0	129.925903075285	0.0248840608528579	0	0	0	0	0.973538986363994	0	0	9.03597037450183	0	0	0	0.0235727359418728	0	0	0	0	0	0.436329909696997	0	0.361083954595996	0	0	0	1.07667013793806	0.0692883136171527	0
2010-02-17	0	0.0924906925461969	0	0	0	2.66016143784733	0.0145566015904221	0	28.55880267051	0	0	0	7.64286293886022	0	0	0.0498149845547398	0	0	17.4570905602593	0	0	84.9705525815549	0.00995362434114316	0	0	0	0	0.224662843007075	0	0	5.25974394933685	0	0	0	0.0117863679709365	0	0	0	0	0	1.09428771003376	0	0.905575632161393	0	0	0	0	0.242509097660033	0.777212899450672
2010-03-02	0	0	0	0	0	0	0.00145566015904222	0	0	0	0	0	0	0	0	0	0	0	2.75953230345142	0	0	0	0	0	0	0	0	0.973538986363994	0	0	0	0	0	0	0	0	0	0	0	0	0	0	0.190572087147886	0	0	0	0	0	0
2010-03-16	0	0	0	0	0.792941678983477	0	0.00291132031808442	0	0	0	0	0	0	0	0	0	0	0	0.255467619358819	0	0	0	0.517588465739444	0	0	0	0	53.5446442500197	0	0.22394944766442	0	0	0	0	0	0	0	0	0	0	0	0	0.417443619466801	0	0	0	0	0	0
2010-04-14	0	0.0726712584291548	0	0	0	0	0.00436698047712665	0	0	0	0	0	0	0	0	0	0	0	0	30.0000000000001	0	0	0.121102429483908	0.388509148935335	0	0	0	26.2106650174921	7.4120780297954	8.51007901124787	0	0.0413685202987271	0	0	0.0471454718837461	0	0	0	0	0	0	2.89534280694529	1.05268390995976	0	0	0	0.0978791034489152	0.10393247042573	6.69957519326473
2010-04-28	0	0	0	0	0	0	0.0058226406361689	0	0	0	0	0	0	0	0	0	0	0	0	0	0	0	0.364966225841916	0	0	0	0	0	18.5301950744887	9.40587680190565	0	0	0	0	0.0117863679709365	0	0	0	0	0	0	10.1336998243085	4.91857482067405	0	0	0	0.293637310346748	0	5.64256565001194
2010-05-11	0	0.158555472936338	0	0.0430377920357116	0	0	0.0349358438170135	0	0	0	0	0	0	0	0	0	0	1	0	0	0	0	0.617124709150876	4.53260673757891	0	0	0	0	20.3832145819376	0	0.269730458940352	0	0	0	0	0	0	0	0	0	0.0913084294344872	4.34301421041796	0.00259281751221612	0	0.00777845253664838	0	0.0367046637933433	0	8.098558412276
2010-06-28	0	0.0330323901950702	0	0	0	0	0.00727830079521108	0	0	0	0.0821128726923085	0	0	0	0	0	0	0	0	0	0	0	0.00829468695095263	0	0	0	0	2.02196558706366	5.55905852234661	6.04663508693927	0	2.05808388486166	0.0464481038211452	0	0	0	0	0	0	0	83.3645960736873	0	2.36724238865336	0	7.10172716596008	0	0	0	4.04150707714348
2010-09-23	0	0.0396388682340842	0	0	0	0	0	0	0	0	0	0	0	0	0	0	0	0	0	0	0	0.494014840590438	0	0	0	0	0	0	0	0	0	0	0	0	0	0	0	0	0	0	0	0	0	0	0	0	0.0978791034489152	0	14.1452747700022
2010-11-09	0	0	0	0	0	0	0.00436698047712665	0	0	0	0	0	0	0	0	0	0	0	0.0723021564223086	0	0	0	0.00126395229728802	0	1.00827730367228	1.44838051003299	0	1.77639207167009	0	0	0	0	0	0	0	0	0	0	0	0.0674820126608207	0.0939939714766783	0	0.0224710851058732	0	0.000899986243909744	0.00714364723109813	0.917616594833591	0.485018195320074	2.02075353857174
2010-11-22	0	0	0	0	0	0	0	0	0	0	0	0	0	0	0	0	0	0	0.0241007188074359	0	0	0	0	0	0	0.0658354777287719	0	0.998501524475891	0	0	0	0	0	0	0.0235727359418728	0	0	0	0	0	0	2.89534280694529	0	0	0	0	0.501630405175692	0.10393247042573	0
2010-12-06	0	0	0	0	0	0	0.00655047071568993	0	0	0	0	0.0619157660217257	0	0	0	0	0	0	0	0	0	0.247007420295218	0	0	0	0.0329177388643862	0	7.48876143356918	0	0	0	0.0465395853360674	0	0	0.00589318398546819	0	0	0	0	0	0	0.723835701736322	0	0	0	0	0.550569956900152	0.0692883136171527	0
2011-01-06	0	0	0	0	0	0.366918819013424	0.0203792422265911	0	85.6764080115298	0	0.0547419151282054	0.454048950825993	0	0.440192364517228	0	0	0	0	5.46411496802182	0	0	174.881253569015	1.03517693147889	0	0	0	0	6.24063452797432	0	0	16.7232884543018	0	0	0	0.0117863679709365	0	0	0	0	0	1.0527324805388	0	0.108898335513079	0	0.0362994451710262	0	0.110113991380029	0.0346441568085766	0.777212899450672
2011-01-19	0	0	0	0	0	1.92632379982046	0.00727830079521108	0	28.55880267051	0	0	0.0206385886739086	0	0	0	0.0199259938218958	0	0	2.69403860009218	0	0	102.755086842812	0.807902509022786	0	0	0	0	0	0	0	2.69730458940355	0	0	0	0	0	0	0	0	0	2.32478422785649	1.44767140347266	0.240483824258049	0	0.0801612747526823	0	0.0734093275866871	0.450374038511492	0.621770319560541
2011-02-17	0	3.6335629214577	0	0	0	0	0.0058226406361689	0	0	0	1.36854787820514	4.87070692704246	0	0.733653940862048	0	0	0	0	0.147014384725359	0	0	9.38628197121825	0.225615485065912	0	0	0	0	11.9820182937107	1.85301950744884	0	28.7262938771475	0	0	0	0	0	0	0	0	0	1.86108063523822	1.44767140347266	0	0	0	0	0	0.450374038511492	0
2011-03-07	0	0.548337677238162	0	0	0	0	0.00145566015904222	0	0	0	12.4811566492308	2.35279910882558	0	0.782564203586185	0	0	0	5	0.571187035736233	0	0	33.5930091601498	0.00331787478038105	0.51801219858045	0	0	0	2.4712912730778	1.85301950744884	1.1197472383221	0.809191376821067	0	0	0	0	0	0	0	0	0	3.66576488759045	4.34301421041796	0	0	0	0	0	0.10393247042573	5.28504771626458
2011-03-21	0	0.3303239019507	0	0	0	0	0	1.36297935421063	0	0	0	0.0619157660217257	0.155976794670617	0.293461576344824	0	0	0	0	0.0843525158260267	0	0	8.64525971033261	0.0348376851940011	0	0	0	0	1.49775228671384	1.85301950744884	1.79159558131535	8.22677899768077	0.206842601493636	0	0	0	0	0	0	0	0.0192805750459488	0	0	0	0	0	0	0	0.0346441568085766	18.1090605572008
2011-04-04	0	0	0	0	0	0.366918819013424	0	0	0	0	0	0	0	0	0	0	0	0	0.308489200735183	0	0	1.97605936236176	0.197413549432673	4.38844627736739	0	0	0	13.4797705804245	7.4120780297954	2.46344392430862	8.22677899768077	0.57915928418218	0	0	0	0	0	0	0	0	1.22192162919683	1.44767140347266	0	0	0	0	0	0.138576627234307	64.7029738792686
2011-04-18	0	0.013212956078028	0	0	0	0	0	0	0	0	0	0	0	0	0	0	0	0	0	0	0	0.494014840590439	0.291972980673533	22.6630336878946	0	0	0	4.49325686014151	20.3832145819376	0.895797790657682	1.07892183576141	2.15116305553381	0	0	0	0	0	0	0	0	0.0187987942953357	0	0	0	0	0	0	0.0346441568085766	14.7515008315738
2011-05-04	0	0.0330323901950702	0	0	0	0	0	0	0	0	0	0	0	0	0	0	0	0	0.0192805750459488	0	0	0.494014840590439	1.14466679923146	0	0	0	0	4.49325686014151	19.8273087297028	3.47121643879853	8.63137468609121	0.444711593211317	0	0	0	0	0	0	0	0	0.0187987942953357	0	0	0	0	0	0.220227982760062	0	106.027383743061
2011-06-06	0	2.47742926463026	0	0	0	0	0	0	0	0	0	2.57982358423857	0	55.0240455646539	0	0	0	0	0	0	0	0	0	0	0	0	0	0	0	167.962085748314	0	7.11021442634368	0	0	0	0	0	0	0	0	38.7725132341298	0	0	0	0	0	0	0	0
2011-06-15	0	3.36930379989716	0	0	0	0	0	0	0	0	0.410564363461538	0	0	0	0	0	0	0	0	0	1.83165462936513	0	0	0	0	0	0	0	13.8976463058664	15.6764613365093	0	0	0	0	0	0	0	0	0	0	2.81981914430035	0	0	0	0	0	0	0	0
2011-07-04	0	0.660647803901404	0	0	0	0	0	0	0	0	1.36854787820513	0	0	0	0	0	0	0	0	0	0.361510782111539	0	0	0.129503049645112	0	0	0	0.299550457342767	0	138.102159393059	0	25.3382186829702	0	0	0	0	0	0	0	0	0	0	0	0	0	0	0	0	31.0885159780269
2011-07-19	0	0.013212956078028	0	0	0	0	0.00436698047712665	0	0	0	0.355822448333332	0.0825543546956347	0.155976794670617	0	0	0	1.34369668598653	0	2.95233805391088	0	0	0	0.00995362434114316	0	0	0.131670955457545	0	0.0748876143356918	1.85301950744884	9.85377569723443	0	0	0.00240248812867991	0.0117863679709365	0	0	0	0	0	0.0265107906881797	0	0	0	0	0	0	0	0.0346441568085766	17.8494714487839
2011-08-16	0	0	0	0	0	0	0	0	0	0	0	0	0	0	0	0	0	0	0	0	0	0	0	0	0	0	0	0	13.8976463058664	0	0	3.72316682688542	0	0	0	0	0	0	0	0	15.7909872080819	0	0	0	0	0	0.489395517244576	0	9.32655479340806
2011-09-27	0	0.44263402861394	1.4280099912544	0.419618472348191	0	0	0.00727830079521108	0	0	0	0	0.0206385886739086	0	0	0	0	0	0	0.0747122283030514	0	0	0	0.00331787478038105	0	0.504138651836144	0.987532165931593	0	145.236585378311	0	0	0	0.144789821045545	0	0.0117863679709365	0	0	0	0	0	0	0	0	0.190572087147886	0	0	0	0.281402422415634	0	10.4923741425841
2011-10-25	0	0.0429421072535916	0.119000832604531	0	0	0	0.0109174511928166	0	0	0	0	0.134150826380407	0	0.0244551313620682	0	0	0	0	0.630233796814456	0	0	0	0	0.388509148935336	0	1.46483937946517	1.51621814444824	0	0	0.111974723832209	10.5194878986739	0.0103421300746817	0.000800829376226638	0	0	0	0	0	0	0.040971221972641	0	0.723835701736322	0	0	0	0	0.207993094828944	0.0346441568085766	0
2011-11-09	0	0	0	0.00537972400446397	0	0	0.00363915039760558	0	0	0	0	0.237343769749946	0	0	0	0	0	0	0.214496397386182	0	0	0	0	0	0	0	0	0.576058571813014	0	0	0	0	0	0.0117863679709365	0	0	0	0	11.4627810134068	0	0	0	0	0	0	0	0.354811750002321	0.0346441568085766	0
2011-11-23	0	0	0	0	0	0	0	0	0	0	0	0.154789415054314	0	0	0	0	0	0	0.194010786399861	0	0	0	0	0	0	0	0	2.69595411608491	0	0.335924171496626	0.269730458940352	0.0103421300746817	0	0.00589318398546819	0	0	0	0	5.73139050670334	0	0	0.723835701736322	0	0	0	0	0.207993094828944	0	0
2012-01-10	0	0.0363356292145772	0	0.0215188960178558	0	1.10075645704027	0.0160122617494644	0	0	0	0	0.0206385886739085	0	0	0	0	0	0	0	0	0	0	0	0	0	0	0	17.2817571543904	0	0	0	0	0	0.0235727359418729	0	0	0	0	0	0	0.0375975885906713	2.17150710520898	0	0	0	0.00142872944621963	0.72185838793575	0.0692883136171531	0
2012-01-24	0	0	0	0.0322783440267837	0	0	0.0625933868388153	0	0	0	0	0.206385886739085	0	0	0	0	0	0	0.0144604312844616	0	0	0	0	0	0	0.0987532165931583	0	4.32043928859761	0	0	0	0	0	0.0825045757965552	0	0	0	0	0	0	0	5.79068561389061	0	0	0	0	0.709623500004635	0	0
2012-02-07	0.12435406763678	0	0	0	0	0.366918819013422	0.0829726290654063	0.0243389170394757	0	0	0	0.227024475412994	0	0	0	0	0	1	0.0192805750459488	30	0.0988129471104874	0.494014840590438	0.0132714991215242	0	0	0	0	28.3824058332272	0	0	0.809191376821059	0	0	0.0235727359418729	0	0	0	0	0	0.0024100718807436	0.0751951771813426	2.8953428069453	0	0	0	0	0.379281525864546	0	0
2012-02-21	0.497416270547121	0.112310126663239	0	0	0	0	0.0232905625446754	0.283954032127217	0	0	0	0.28894024143472	0	0.440192364517231	0	0	0	0	0.134964025321641	0	0	0.494014840590438	0.0182483112920958	0.388509148935335	0	0.263341910915089	0	119.295969636757	0	0.447898895328838	2.96703504834388	0	0	0	0	0	0	0	0	0.0313309344496667	0.413573474497384	2.8953428069453	0	0	0	0	0.513865293106805	0	0
2012-03-05	0.248708135273561	0	0	0	0	2.4767020283406	0.0480367852483931	0	0	0	0.780072290576923	0.309578830108628	0	0	0	0	0	7	8.4304314388411	0	0	33.5930091601498	0.0248840608528579	0	0	0.230424172050703	0	340.398246980417	2.77952926117328	0	0	0	0	0.0117863679709365	0	0	0	0	0	0.0964028752297438	0	2.8953428069453	0	0	0	0.0742939312034206	0.905381706902466	0.0346441568085765	3.88606449725336
2012-03-20	0	0	0	0	0	0	0.0305688633398865	0	0	0	0.561104630064102	0	0	0	0	0	0	0	8.18219403512451	30	0	23.712712348341	0.253817420699151	1.81304269503156	0	0	0	0.748876143356918	11.1181170446931	0	0	0	0	0.0117863679709365	0	0	0	0	0	0.219316541147667	0	1.44767140347265	0	0	0	0.0100011061235374	0.0244697758622288	0	6.29542448555044
2012-04-05	0	0	0	0	0	0	0.00727830079521108	1.07091234973693	0	0	0	0	0	0.538012889965505	0	0	1.34369668598652	0	3.5765466710235	60	0	0	0.207367173773816	4.98088652481199	0	0.197506433186317	0	0	15.7506658133152	0	0	0	0	0	0	0	0	0	0	0.132553953440898	0	1.44767140347265	1.46105266813379	0	0	0.0371469656017103	0.354811750002318	0.242509097660036	14.6116025096726
2012-04-28	0	0	0	0	0	0	0.00727830079521108	0.121694585197379	0	0	0	0	0	0	0	0	8.95797790657677	0	0.024100718807436	0	0	0	0	0	0	0	0	15.1647419029776	21.3097243356618	2.46344392430861	0	0.444711593211314	0	0.0117863679709365	0	0	0	0	0	0	0	2.8953428069453	0.0544491677565389	0	0	0	0.526100181037919	0	7.53896512467152
2012-05-09	0	0	0	0	0	0	0.00727830079521108	0.121694585197379	0	0	0	0	0	0	0	0	8.95797790657677	0	0.024100718807436	0	0	0	0	0	0	0	0	12.5811192083962	21.3097243356618	2.46344392430861	0	0.444711593211314	0	0.0117863679709365	0	0	0	0	0	0	0	2.8953428069453	0.0544491677565389	0	0	0	0.526100181037919	0	7.53896512467152
2012-05-23	0	0	0	0	0	0	0	2.71784573607479	0	0	0	0	0	0.0978205254482736	0	0	5.37478674394606	0	0.024100718807436	0	0	0	0.119443492093718	29.8853191488719	0	0	0	0.224662843007075	41.6929389175991	11.8693207262142	0	0.506764373659404	0	0	0	0	0	0	0	0	0	0	0.217796671026156	0	0	0.00142872944621963	0.0856442155178008	0	9.3731875673751
2012-06-05	0	0	0	0	0	0	0.00145566015904222	0	0	0	0	0	0	0	0	0	13.4369668598652	0	0	0	0	0	0	0	0	0	0	0	0	21.4991469757842	0.809191376821059	17.7057266878551	0.104908648285689	0.0117863679709365	0.0117863679709365	0	0	0	0	0	0	1.44767140347265	0.290395561368208	0	0	0.435762481096986	0.293637310346746	0	13.0260881947933
2012-06-21	0	0	0	0	0	0	0	0	0	0	0	0	0	0	0	0	25.2195323946418	0	0	0	0	0	0.153132682171433	0	0	0	0	0	2.850799242229	50.4390647892836	0	18.6344686030301	0	0	0	0	0	0	0	0	0	0	0	0	0	0	0	0	38.5105490718801
2012-07-04	0	0	0	0	0	0	0	0.202824308662298	0	0	0	0	0	0	0	0	10.3016745925633	0	0	0	0	0	0.00165893739019053	0	0	0	0	0	5.55905852234655	0	0	2.90613855098556	0	0.0471454718837458	0.0117863679709365	0	0	0	0	0	0	0	0	0	0	0.0214309416932944	0.171288431035602	0.0346441568085765	109.5092975326
2012-07-23	0	0	0	0	0	0	0.00145566015904222	0.0730167511184272	0	0	0	0	0	0	0	0	4.92688784861722	0	0	0	0	0	0	0	1.00827730367229	0	0	1.49775228671384	0	43.4461928468973	0	16.7232243307603	0.225833884095911	0	0	0	0	0	0	0	0	2.8953428069453	0	0	0	0.0471480717252477	0.183523318966716	0.0346441568085765	117.048262657271
2012-09-03	0	0	0	0	0	0	0	0.0243389170394757	0	0	0.123169309038461	0	0	0.195641050896547	0	0	3.35924171496629	1	0	0	0	0	0.00331787478038105	0	1.51241595550843	0.329177388643861	2.20096182258616	3.36994264510613	2.77952926117328	0	0	0.289579642091088	0.008809123138493	0.0235727359418729	0	0	0	0	0	0.0024100718807436	0	0	0.608015706614685	0	0	0.00142872944621963	0.0856442155178008	0.242509097660036	10.1037676928587
2012-10-30	0	0	0	0	0	0	0.00145566015904222	0	0	0	0	0.0412771773478171	0	0	0	0	0	4	0	0	0	0	0.0165893739019053	0.841769822693226	0	0.16458869432193	0.0244551313620684	0.411881878846305	0	0.335924171496629	0	0	0	0	0	0	0	0.267885989192188	0	0	0	0	0	0	0	0	0.660683948280178	0.0173220784042883	0.233163869835202
2012-11-13	0	0	0	0	0	0	0.00727830079521108	0	0	0	0	0.0825543546956342	0	0	0	0	0	2	0	0	0	0	0	0	0	2.09027641788852	0	1.94707797272799	0.463254876862213	1.45567140981872	0	0	0	0.0648250238401505	0	0	0	0	0	0	0	0.723835701736326	0	0	0	0	0.575039732762377	0.0519662352128648	0.0155442579890134
2012-12-11	0.12435406763678	0.0594583023511263	0	0	0	0	0.0109174511928166	0	0	0	0	0.0825543546956342	0	0	0	0	0	0.5	0	15	0	0	0	0.77701829787067	0.252069325918071	0	0	0.299550457342767	0	0	0	0	0	0.0353591039128094	0	0	0	0	0	0	0	0	0	0	0	0	0.868677043109123	0	0
2013-02-11	0	0.231226731365491	0	0	0	0	0.0232905625446754	0	0	0	0	2.18769039943431	0	0.0978205254482736	0	0	0.447898895328838	0	0.0433812938533847	0	0	3.45810388413307	0.175847363360196	6.6046555319007	0	0	0	0	0	0	7.68731807980006	0	0	0.0117863679709365	0.0353591039128094	0	5.32108248641601	0	0	0.0024100718807436	0	1.44767140347265	0	0	0	0.0685790134185421	0.269167534484517	0	7.30580125483632
2013-02-26	0	5.179478782587	0	0	0	1.37594557130033	0.270752789581852	0	0	0	0	6.35668531156383	0	0	0	0	0	3	0.0144604312844616	0	0.303669056973693	27.9118384933597	0.0414734347547632	16.9648995035096	0.504138651836143	0.329177388643861	0	0	0	2.23949447664419	70.5345150129023	0	0	0	0	0	5.32108248641601	0	0	0.00482014376148719	0.112792765772014	8.68602842083591	0	0	0	0.00571491778487851	0.159053543104487	0	1.67877986281345
2013-03-26	0	0.541731199199151	0	0	0	0	0.00145566015904222	0	0	0	0	0	0	0	0	0	0	1	0.467553944864257	0	0	20.7486233047984	0.253817420699151	0	0	0	0	0.224662843007075	0.926509753724426	1.56764613365093	0	0	0	0	0	0	0	0	0	0	0.263183120134699	0	0	0	0	0.0142872944621963	0	0	10.1193119508478
2013-04-08	0	0.303897989794646	0	0.0753161360624953	0	0	0	0	0	0	0	0	0	0	0	0	0.223949447664419	0	0.0988129471104874	0	0	4.44613356531394	0.270406794601056	0	0	0	0	0.374438071678459	4.63254876862213	0.447898895328838	0.134865229470177	0.0568817154107494	0	0	0	0	0	0	0	0	0	0	0	0	0	0	0	0	34.0419249959394
2013-04-24	0	0	0	0	0	0	0	0.0486778340789514	0	0	0	0	0	0	0	0	0	0	0.012050359403718	0	0	0.741022260885657	0.155940114677909	0	0	0	0	0	4.63254876862213	0	0	0.248211121792361	0	0	0	0	0	0	0	0	0	4.34301421041796	0	0	0	0.0285745889243925	0	0	120.079392965129
2013-05-27	0	0	0	0	0	0	0.00436698047712665	0	0	0	0	0	0.857872370688396	0	0	0	0	0	0.0530215813763591	0	0	0	0.841081256826597	0	0	0	0	0	12.0446267984175	0.671848342993258	0	13.6412695685052	0	0	0	0	0	0	0	0	0	4.34301421041796	0.0998234742203214	0	0	0.00285745889243925	0.318107086208974	0.277153254468612	0.932655479340806
2013-06-10	0	0.0528518243121123	0	0	0	0	0	0.21093728100879	0	0	0	0	0	0	0	0	0.223949447664419	0	0	0	0	0	0.341741102379248	0.259006099290223	0	0	0	0	141.292737442975	0	0	54.6788417048422	0	0	0.0117863679709365	0	0	0	0	0	0	2.8953428069453	0	0	0	0	0.0856442155178008	0	5.75137545593497
2013-06-25	0	0	0	0	0	0	0.00145566015904222	3.64272458357487	0	0	0	0	0	0	0	0	0.447898895328838	0	0	0	0	0	0.12607924165448	0	0	0	0	0	92.6509753724426	0.223949447664419	0	307.978761590768	0	0.0117863679709365	0	0	0	0	0	0	0.0939939714766783	1.44767140347265	0.018149722585513	0	0	0	0	0.0692883136171531	0
2013-07-09	0	0	0	0	0	0	0.00145566015904222	0.34074483855266	0	0	0	0	0	0	0	0	0.671848342993258	0	0	0	0	0	0.0132714991215242	0	0	0	0	0.599100914685535	1.85301950744885	0.223949447664419	0	191.677278029578	0.000800829376226636	0	0	0	0	0	0	0	0	0	0	0	0	0.00428618833865888	0	0	1.86531095868161
2013-07-22	0	0.0792777364681684	0	0	0	0	0.00436698047712665	0.137920529890362	0	0	0	0	0	0	0	0	0	0	0	0	0	0	0	0	0	0	0	1.12331421503538	11.5813719215553	0	0	115.20098690188	0.0536555682071846	0.0353591039128094	0	0	0	0	0	0	0	7.23835701736326	0	0	0	0.0414331539403692	0	0	2.56480256818722
2013-09-23	0	0.145342516858309	0	0	0	0	0.00145566015904222	0	0	0	0.150540266602564	0.0412771773478171	0.779883973353088	0.0978205254482736	0	0	0	0	0.855575517663976	0	0	0.494014840590438	0.0182483112920958	0	0	0	0	1.19820182937107	0	0	0	0	0.00240248812867991	0.0235727359418729	0	0	0	0	0	0.089172659587513	0	1.44767140347265	0.0907486129275649	0	0	0.0242884005857337	0.0734093275866864	0	0.155442579890134
2013-11-18	0	0.0132129560780281	0	0.0295884820245517	0	0	0.00582264063616886	0	14.2794013352549	0	0	0.0515964716847714	0	0	0.213982393008864	0	0	0	0	0	0	1.85255565221414	0	0	0	0	0	0.82376375769261	0	0	0	0	0.00240248812867991	0.0589318398546823	0	0	0	1.33942994596094	0	0	0	0	0	0	0	0.000714364723109813	0.685153724142406	0.0866103920214413	0
2013-12-03	0	0.204800819209435	0	0.161391720133919	0	0	0.00655047071568997	0	0	0	0	0.0515964716847714	0	0	0	0	0	0	0.0024100718807436	0	0	1.97605936236175	0	0	0.252069325918071	0	0	0	0	0	0	0	0	0.276979647317007	0	0	0	0	0	0.0024100718807436	0	5.06684991215428	0	0	0	0	0.660683948280178	0	0
[truncated: 14 more columns]
