# Supplementary material for: Seasonal Variations in the Biodiversity, Ecological Strategy, and Specialization of Diatoms and Copepods in a Coastal System With Phaeocystis Blooms: The Key Role of Trait Trade-Offs
Source: Frontiers journal article supplement (doi:10.3389/fmars.2021.656300), 2021-09-06
Supplement: Data_Sheet_3.xlsx [file Data_Sheet_3.xlsx]

## Sheet: diatom traits
	log(V+1) (µm3)	log(MLD+1) (µm)	Degree.silicification	log(SV+1) (µm-1)	Tychopelagic.habit	Coloniality
Act	4.23002557240212	1.5	3	0.0863598306747482	1	0
Agla	2.54125071628054	1.04	3	0.315969308689571	1	3
Talt	4.55001223990907	1.69	3	0.0492180226701817	1	1
Bbro	2.43161056693575	1.69	2	0.184691430817599	1	2
Bhya	4.26002386560116	1.53	3	0.0863598306747482	0	2
Bpax	4.0800361215394	1.99	3	0.270315405234468	1	2
Cclo	1.73801257055064	1.66	1	0.495544337546448	1	0
ccom	2.65097117754432	0.95	1	0.252853030979893	0	2
Ccon	6.91000005342989	2.39	3	0.00860017176191757	1	0
Ccry	5.75000077229625	2.07	3	0.0170333392987804	0	0
Ccur	2.93050995201285	1.27	2	0.0863598306747482	0	3
Cdan	3.15030734816756	1.11	2	0.371039680773237	0	1
Cdec	4.00007202346105	1.34	1	0.110589710299249	0	2
Cden	3.77007374752283	1.5	2	0.113943352306837	0	1
Cdia	3.88005724738947	1.34	1	0.117271295655764	0	2
Cdid	2.76075406229514	1.38	1	0.416986153780287	0	2
Cpel	4.52001311528564	1.68	1	0.248738502387061	0	1
Crad	5.25763010041342	1.89	3	0.0293837776852097	1	0
Csoc	2.00836710598796	0.9	1	0.416986153780287	0	4
Cwai	6.93426935705913	2.54	3	0.00860017176191757	1	0
Cwig	2.004751155591	0.9	1	0.409933123331295	0	0
Dbri	4.91000534295652	2	2	0.10575401437085	0	2
Pdel	1.80682912831245	1.74	1	0.750508394851346	0	3
Dfra	4.2500244214868	1.69	3	0.301029995663981	0	2
Dipl	4.92000522133671	1.68	3	0.0170333392987804	1	0
Dsur	3.40017286134099	1.14	3	0.123851640967086	1	1
Ezod	3.61215294816645	1.59	2	0.0293837776852097	0	2
Gdel	3.98004547383422	1.62	2	0.352554402316871	0	2
Gfla	5.22000261687515	1.87	1	0.164352855784437	0	2
Gstri	4.52001311528564	1.9	1	0.318839616878956	0	3
Lann	4.27002332236834	1.53	3	0.270315405234468	0	2
Ldan	2.78072015202385	1.57	1	0.496087199666384	0	3
Lmin	1.42657563347475	1.47	1	0.619093330626743	0	2
Navi	2.85061302440297	1	3	0.0293837776852097	1	0
Nlon	2.85061302440297	1.3	1	0.495544337546448	1	0
Tmob	5.26000238661913	1.83	3	0.0492180226701817	1	1
Treg	5.74000079028532	1.99	3	0.0492180226701817	1	1
Brho	4.9500048728369	1.89	3	0.0492180226701817	1	1
Osin	6.46000015058588	2.22	3	0.0293837776852097	1	1
Pame	2.00615572106282	1.44	1	0.471291711058939	0	0
Pfra	3.10034483543103	1.9	1	0.320146286111054	0	3
Pleu	5.4400015768251	1.99	3	0.0211892990699381	1	0
Ppu	2.71084598225105	2.01	1	0.369215857410143	0	3
Pstel	4.78000720743456	1.59	3	0.0791812460476248	1	0
Psub	2.71084598225105	1.83	1	0.334453751150931	0	1
Pother	1.728197456785	1.58	1	0.693726948923647	0	1
Psul	2.87058545234818	1.14	3	0.113943352306837	1	2
Ramp	3.42753591694353	1.69	3	0.0374264979406237	1	0
Rimb	4.34001985063418	2.41	2	0.437296997877899	0	3
Rpun	3.50448859084313	2.59	3	0.187520720836463	0	1
Nrob	6.73000008086941	2.47	3	0.0253058652647703	0	1
Rset	3.28637755420478	2.65	3	0.0934216851622351	0	1
Ske	2.01422348404507	0.77	2	0.419741085132813	0	1
Htam	5.33000203134316	1.99	1	0.0211892990699381	0	1
Meu	3.52527139210371	1.69	2	0.0374264979406237	1	2
Tcon	3.3600250891894	1.36	3	0.301029995663981	0	3
Tlev	2.86021890254181	1.14	3	0.397940008672038	0	3
Tnit	2.97046510578108	1.14	3	0.264817823009536	1	1
Tnor	3.87079770329872	1.57	3	0.334732532056267	0	2
Tpun	4.51001342077517	1.73	3	0.0718820073061254	0	0
Tang	3.40017286134099	1.14	3	0.301029995663981	0	2
Tgra	4.0811370516504	1.63	3	0.351283530173715	0	3
Thsp	3.14449637008241	1.14	3	0.230448921378274	0	2
phaeo						4
