# Supplementary material for: Seasonal Variations in the Biodiversity, Ecological Strategy, and Specialization of Diatoms and Copepods in a Coastal System With Phaeocystis Blooms: The Key Role of Trait Trade-Offs
Source: Frontiers journal article supplement (doi:10.3389/fmars.2021.656300), 2021-09-06
Supplement: Data_Sheet_4.xlsx [file Data_Sheet_4.xlsx]

## Sheet: diatom.phenology
	start.bloom.timing (mth)
Act	2
Agla	1.95
Talt	5.9
Bbro	1.54
Bhya	2.5
Bpax	1.1
Cclo	1.9
ccom	1.9
Ccon	1.1
Ccry	1
Ccur	2
Cdan	1.5
Cdec	2.5
Cden	2.2
Cdia	2.7
Cdid	2.9
Cpel	3.3
Crad	1.95
Csoc	2.2
Cwai	1
Cwig	1.2
Dbri	1.9
Pdel	3.1
Dfra	3.1
Dipl	3.9
Dsur	8.3
Ezod	9.1
Gdel	3.9
Gfla	4
Gstri	4.95
Lann	1.28
Ldan	5.5
Lmin	6
Navi	2.2
Nlon	1.8
Tmob	2.1
Treg	1.9
Brho	2
Osin	9.8
Pame	8.2
Pfra	2.045
Pleu	2.05
Ppu	4
Pstel	1
Psub	9.3
Pother	3
Psul	3
Ramp	9.3
Rimb	3.7
Rpun	3
Nrob	2.8
Rset	1.9
Ske	1.1
Htam	2.1
Meu	2.9
Tcon	1.4
Tlev	1.3
Tnit	1.8
Tnor	1.3
Tpun	1.2
Tang	1.2
Tgra	1.2
Thsp	1.8
phaeo
