# Supplementary material for: Seasonal Variations in the Biodiversity, Ecological Strategy, and Specialization of Diatoms and Copepods in a Coastal System With Phaeocystis Blooms: The Key Role of Trait Trade-Offs
Source: Frontiers journal article supplement (doi:10.3389/fmars.2021.656300), 2021-09-06
Supplement: Data_Sheet_5.xlsx [file Data_Sheet_5.xlsx]

## Sheet: diatom.defence.traits
	Chain/Size>500µm	silification	setae.spicule	mucus/potential toxins	defenceEND
Act	0	0	0	0	0
Agla	1	0	1	0	2
Talt	1	0	0	0	1
Bbro	0	0.5	0	0	0.5
Bhya	1	0	1	0	2
Bpax	1	0	0	1	2
Cclo	0	0	1	1	2
ccom	1	0	1	0	2
Ccon	0	0	1	0	1
Ccry	0	0	1	0	1
Ccur	1	0.5	1	0	2.5
Cdan	0	0.5	1	0	1.5
Cdec	1	0	1	0	2
Cden	1	0.5	1	0	2.5
Cdia	0	0	1	0	1
Cdid	0	0	1	0	1
Cpel	1	0	0	0	1
Crad	0	0	0	0	0
Csoc	1	0	1	1	3
Cwai	0	0	0	1	2
Cwig	0	0	1	0	1
Dbri	1	0.5	1	0	2.5
Pdel	1	0	1	1	3
Dfra	1	0	0	0	1
Dipl	0	0	0	0	0
Dsur	0	0	0	1	1
Ezod	1	0.5	1	0	2.5
Gdel	1	0.5	0	0	1.5
Gfla	1	0	0	0	1
Gstri	1	0	0	0	1
Lann	1	0	1	0	2
Ldan	1	0	0	0	1
Lmin	1	0	0	0	0
Navi	0	0	0	1	1
Nlon	0	0	1	1	2
Tmob	0	0	1	0	1
Treg	0	0	1	0	1
Brho	0	0	1	0	1
Osin	1	0	1	1	3
Pame	0	0	0	1	1
Pfra	1	0	1	1	3
Pleu	0	0	0	0	0
Ppu	1	0	1	1	3
Pstel	0	0	0	0	0
Psub	0	0	1	1	2
Pother	1	0	1	1	3
Psul	1	0	0	1	1
Ramp	0	0	0	1	1
Rimb	1	0.5	0	0	1.5
Rpun	1	0	0	0	1
Nrob	1	0	0	0	1
Rset	1	0	0	0	1
Ske	0	0.5	0	1	1.5
Htam	0	0	0	0	0
Meu	0	0.5	0	0	0.5
Tcon	1	0	1	0	2
Tlev	1	0	1	0	2
Tnit	0	0	0	0	0
Tnor	1	0	1	0	2
Tpun	0	0	1	0	1
Tang	1	0	1	0	2
Tgra	1	0	1	0	2
Thsp	0	0	1	0	1
