# Supplementary material for: Seasonal Variations in the Biodiversity, Ecological Strategy, and Specialization of Diatoms and Copepods in a Coastal System With Phaeocystis Blooms: The Key Role of Trait Trade-Offs
Source: Frontiers journal article supplement (doi:10.3389/fmars.2021.656300), 2021-09-06
Supplement: Data_Sheet_6.xlsx [file Data_Sheet_6.xlsx]

## Sheet: diat.ecological.specialization
	H.DIP	H.DSI	H.DIN	H.PAR	H.T	H.Sal	Tol
Act	0.899806	13.806528	30.000697	16.681029	16.280338	0.972937	0.60351741
Agla	1.186628	12.415814	27.089954	18.844465	15.599932	1.911193	1.27422825
Talt	1.081938	19.312790	29.973303	17.553310	16.855773	1.930568	5.56634497
Bbro	1.052266	15.353334	29.468795	16.096109	16.434522	1.674714	1.86392735
Bhya	1.037796	5.537934	19.485230	31.423053	20.102877	1.236912	0.77909203
Bpax	1.577550	16.326483	31.813284	12.994846	14.969069	2.906045	2.20165572
Cclo	1.031061	15.227465	27.573122	18.583072	15.782478	1.871770	0.61619363
ccom	1.185593	11.992090	23.757151	18.389582	16.795940	2.101357	1.27138868
Ccon	1.143397	16.110600	30.391920	15.976690	20.692819	1.585263	0.3272991
Ccry	0.674794	8.806905	19.109403	14.898747	11.006558	1.871765	0.93118098
Ccur	0.821221	12.142893	24.628878	17.791291	16.980126	1.167543	1.87372651
Cdan	1.078823	13.093730	24.361631	16.497293	16.537220	1.959450	0.92942743
Cdec	0.721241	8.671694	21.150468	17.612395	18.561502	1.203371	0.97870194
Cden	0.737886	9.344563	27.041171	20.736328	17.805177	1.088025	0.86829398
Cdia	0.866629	9.581271	23.289872	16.987140	17.227728	1.302620	1.22141051
Cdid	0.950640	11.158660	22.501095	18.525894	20.231153	0.870985	3.88557923
Cpel	1.019195	13.561466	22.225353	20.812485	16.323959	1.913062	1.55299379
Crad	1.522085	13.687058	27.170970	20.871177	16.136396	2.518306	1.67406657
Csoc	1.091219	14.101127	25.771398	16.542078	16.031563	1.936315	1.9944177
Cwai	1.108061	9.469703	25.569785	13.725670	11.179418	1.109929	1.25252834
Cwig	0.903027	11.443418	25.095728	20.037423	17.800279	1.178266	0.4598986
Dbri	1.323667	15.228258	28.535054	15.162487	15.572087	2.009983	1.09747495
Pdel	0.901793	11.402226	22.218372	19.383084	15.810932	1.627087	1.17089392
Dfra	0.797456	11.548838	23.462791	18.695135	16.678981	1.062696	1.13831511
Dipl	0.839773	11.296679	24.801126	19.051269	16.291797	1.300440	2.2887977
Dsur	1.373274	19.407622	26.045956	18.439406	16.938255	1.252964	0.85849947
Ezod	1.125753	11.681872	24.371058	16.095738	15.895699	1.766269	1.37150796
Gdel	1.084098	14.292867	26.468787	18.130246	15.950187	1.950654	2.32600833
Gfla	0.882891	8.695597	19.223849	19.152854	15.508770	1.871516	1.14835825
Gstri	0.981931	12.851535	23.011845	19.024978	15.764398	2.017664	1.11020458
Lann	1.133609	13.044513	27.535513	18.678362	14.864224	2.039297	1.18741452
Ldan	0.649331	9.766570	18.466826	18.791619	14.616343	1.211982	0.56826109
Lmin	0.664750	7.324718	19.339379	19.147347	14.597760	1.302844	1.6598489
Navi	1.146656	14.772091	27.770492	18.498636	15.375613	1.924643	1.57788551
Nlon	0.874779	13.278897	28.419157	20.312762	16.637211	0.987362	2.24968551
Tmob	0.865491	12.644617	28.106944	13.962014	17.980939	1.855480	1.56229671
Treg	1.077679	13.942788	26.625076	1.105586	17.557335	1.794269	3.77343547
Brho	1.195345	13.516757	31.878606	17.278296	15.485110	1.935896	4.43550277
Osin	0.805759	9.838594	31.025644	17.089062	15.509534	2.508925	0.36057208
Pame	1.047165	14.529773	25.934358	18.161726	16.954756	1.395713	1.75459733
Pfra	0.503544	7.909469	27.027646	26.208314	16.564721	1.563885	1.74409028
Pleu	0.656715	9.216000	27.460907	19.200663	16.261125	1.655901	0.74009656
Ppu	1.094493	13.241205	20.644660	20.189405	16.619248	1.052804	1.57118056
Pstel	1.219622	1.040091	21.499064	26.333544	18.169911	1.852502	0.59729992
Psub	1.017777	16.325408	9.236749	17.408768	20.407667	1.204825	1.15056577
Pother	1.153921	16.3	27.608991	17.258890	16.090570	1.933969	2.69756335
Psul	1.082908	15.415550	27.444709	15.359074	15.453769	1.946986	4.3490899
Ramp	1.152291	15.188561	27.805536	18.395408	15.771543	2.061961	1.98676475
Rimb	0.878035	9.502035	23.933637	18.373822	17.853898	1.729725	1.35257511
Rpun	0.795133	12.082793	20.707743	22.043167	17.701674	1.105575	1.73964627
Nrob	0.875843	20.630210	28.135199	20.451058	19.412714	1.786377	2.6343495
Rset	1.368361	15.274068	30.737451	18.435750	16.742142	2.369870	0.94769047
Ske	1.218424	16.403393	29.596722	17.757395	15.897864	2.322155	4.21546026
Htam	0.765210	7.352476	24.986048	23.428550	18.115111	0.978650	0.66404403
Meu	1.109221	11.229829	22.604351	15.778873	15.443990	2.115691	0.74591842
Tcon	1.054427	16.122488	24.591969	16.113220	17.796283	0.974583	0.78923043
Tlev	0.957575	14.346029	28.819993	16.806997	15.950550	1.266405	2.10504976
Tnit	1.143424	15.417252	28.047186	17.016253	15.830436	2.220366	3.67022505
Tnor	1.068265	13.521187	28.367609	14.842020	14.830794	1.590640	0.73890094
Tpun	1.008671	11.260633	26.869862	14.027249	17.396592	1.620301	1.14527467
Tang	0.925297	12.506404	29.750360	23.149348	17.065494	1.803112	1.85813788
Tgra	1.153203	14.431764	28.304946	17.431438	15.965252	2.015958	2.01639796
Thsp	1.206615	16.858526	29.290166	18.050711	15.958678	2.182799	0.79324121
phaeo					15.014959
