# Supplementary material for: Seasonal Variations in the Biodiversity, Ecological Strategy, and Specialization of Diatoms and Copepods in a Coastal System With Phaeocystis Blooms: The Key Role of Trait Trade-Offs
Source: Frontiers journal article supplement (doi:10.3389/fmars.2021.656300), 2021-09-06
Supplement: Data_Sheet_7.xlsx [file Data_Sheet_7.xlsx]

## Sheet: copepods
µgC.L-1	Calanus helgolandicus	Paracalanus parvus	Pseudocalanus elongatus	Temora longicornis	Centropages hamatus	Acartia clausi	Oithona nana	Corycaeus anglicus	Euterpina acutifrons
2007-02-19	0	365.99	354.66	2698.78	0	131.15	0	0	6.22
2007-03-13	0	0	884.42	302.38	42.66	92.32	0	0	35.55
2007-03-27	0	961.88	892.5	10883.44	2204.78	1411.3	0	0	262.5
2007-04-02	0	925.69	895.98	14015.5	2841.25	2306.9	0	0	245.33
2007-04-11	0	2556.21	1016.68	21376.28	3632.56	5328	0	0	75.31
2007-04-17	3.48	732.56	781.4	8480.04	3906.59	4197.1	0	0	32.56
2007-05-02	31.1934	274.28	257.25	2041.09	1038.93	2599	0	0	20.91
2007-05-15	0	64.96	75.79	340.18	101.04	473.32	0	0	5.61
2007-05-31	0	109.09	0	1804	529.39	2384.51	0	0	0
2007-06-14	70.9924	477.35	14.28	6436.58	4694.68	9579.15	0	0	9.52
2007-07-16	0	816.67	90.74	10473.45	2924.15	11325.24	0	0	17.28
2007-07-30	5.96663	4242.86	0	15988.95	3743.63	11779.16	0	0	320
2007-08-30	32.2233	558.32	0	633.9	62.21	285.1	0	7.41	86.42
2007-09-12	0	94.28	0	70.87	0	52.95	0	0	926.66
2007-10-05	16.3766	338.83	0	939.37	297.61	767.16	1.62	0	496.07
2007-10-25	1.63702	162.81	0	400.74	0.79	1187.48	0.93	23.56	94.24
2007-12-11	0	558.79	100.3	1184.71	26.74	1933.6	0.1	38.21	52.01
2008-02-11	0	1066.68	0.21	235.2	0.5	2095.06	0	0	0.14
2008-02-21	24.5638	489.15	19.76	1996.03	130.43	1931.96	0	0	9.88
2008-03-26	0	234.72	7.3	4036.84	1226.68	2623.31	0	0	14.6
2008-04-08	8.56698	232.7	261.05	1502.29	283.99	1543.83	0	0	11.6
2008-04-21	13.92	251.07	206.76	2527.78	689.13	3901.92	0	0	3.83
2008-05-05	94.5672	440.21	237.77	1617.72	1551.99	2672.86	0	0	12.68
2008-05-22	50.6016	170.12	625.95	5853.72	1783.01	3805.58	0	0	16.96
2008-06-05	11.6007	4.2	1.87	25.8	22.4	31.36	0	0	0
2008-07-01	15.6428	214.41	6.29	1358.08	853.25	868.91	0	0	0
2008-07-20	6.96	4798.08	0	1091.01	2728.64	5557.44	0	0	0
2008-09-15	7.32688	1232.31	0.21	1547.48	147.6	2605.34	0	52.72	123.01
2008-10-29	0	633.6	0	326.58	30.72	750.74	0	490.06	234.67
2008-12-15	3.27618	607.65	3.87	107.08	0.5	681.63	0	101.83	38.74
2009-01-13	3.79753	1038.29	0.25	86.57	16.29	941.15	0	46.53	11.31
2009-01-27	24.7419	684.63	4.98	95.23	47.77	456.06	0	22.75	3.32
2009-02-09	1.54691	295.78	15.19	212.27	72.92	514.47	0	2.48	0
2009-02-25	10.7082	231.35	16.36	1715.83	157.02	666.27	0	6.23	0
2009-03-11	3.71171	311.04	44.8	1628.83	548.3	1111.25	0	0	0
2009-04-07	0	923.97	59.89	3565.28	2371.29	4332.04	0	0	0
2009-04-27	1.04486	1141.89	195.91	1582.88	1253.71	9942.49	0	0	0
2009-05-20	0	493.2	20.73	2953.79	1492.77	8348.25	0	0	0
2009-06-09	41.6613	430.95	8.38	2387.44	1266.88	4054.69	0	0	0
2009-06-25	4.64072	237.74	0	1535.14	2239.79	4755.46	0	0	5.87
2009-07-21	18.5607	2338.96	15.82	4406.1	3948.05	7712.43	0	0	73.82
2009-08-24	40.6915	1061.85	0	1427.53	3265.18	8065.94	0	0	261.43
2010-01-05	0	8.72	20.39	43.36	163.08	597.9	0	0	13.59
2010-01-18	0	201.58	7.46	95.24	53.72	109.49	0	0	0
2010-02-03	0	179.98	0	59.52	83.96	68.44	0	0	0
2010-02-17	0	132.03	18.69	436.68	134.4	68.44	0	0	0
2010-03-02	0	72.01	0	952.52	45.25	250.9	0	0	0
2010-03-16	0	63.99	0	17568.88	716.72	669.06	0	0	0
2010-04-14	0	0	69.99	4076.55	739.14	564.52	0	0	0
2010-07-26	0	473.15	24	340.19	57.63	68.41	0	0	5.33
2010-08-25	0	5.13	215.99	110.55	134.05	195.4	0	0	2.66
2010-09-23	0	1003.78	101.2	2136.41	1769.47	2490.92	0	0	38.54
2010-11-09	0	7496.82	1140.93	799.24	470.19	3138.22	0	0	210
2010-11-22	0	614.25	634.62	396.85	662.95	1550.89	0	0	233.95
2010-12-06	0	519.99	323.55	241.11	970.56	973.18	0	0	161.77
2011-01-06	0	1989.82	484.2	481.08	358.36	1332.59	0	0	45.25
2011-01-19	0	48	247.33	1021.99	279.97	593.03	0	0	0
2011-02-17	0	310.15	407.79	842.63	496.2	1551	0	0	3.83
2011-03-07	0	44.31	260.92	1570.11	1039.65	914.36	0	0	3.28
2011-03-21	66.2895	531.43	426.67	1219.02	1695.83	3258.41	0	0	8.89
2011-04-04	348.015	1710	1470	893	7447.26	10321.02	0	0	31.11
2011-04-18	180.786	140.26	1527.27	2319.48	4712.26	17017.8	0	0	0
2011-05-05	0	126	784	4097.88	2665.34	8541.93	0	0	0
2011-06-06	0	558.09	659.14	888.73	3009.23	23533.53	0	0	10.72
2011-06-15	0	617.14	1120	1209.57	1621.17	15531.77	0	0	0
2011-07-04	0	103.38	944.82	2137.09	3859.31	15401.26	0	0	40.21
2011-07-19	82.2885	340.49	165.52	774.23	913.56	9950.52	0	0	0
2011-09-27	0	2481.23	8533.54	8014.1	940.71	7626.94	0	0	2311.79
2011-10-25	51.5585	413.33	228.15	1256.81	199.09	1888.07	0	1765.93	1285.93
2011-11-09	0	0	0	0	0	0	0	0	0
2011-11-23	0	0	0	0	0	0	0	0	0
2012-01-10	0	349.7	0	102.03	230.36	166.17	0	0	21.32
2012-01-24	0	495.99	49.77	79.39	44.8	273.72	0	0	24.78
2012-02-07	0	103.98	6.13	79.39	149.27	68.44	0	0	4.14
2012-02-21	0	296	155.55	396.85	880.95	288.91	0	0	16.59
2012-03-08	0	335.99	22.39	825.58	2239.76	748.14	0	0	9.95
2012-06-21	0	286.58	17.85	1383.7	1690.5	8161.06	0	0	0
2012-07-04	0	707.13	110	3125.5	2015.8	4629.06	0	0	0
2012-07-23	0	180.01	1232.01	74.12	1629.27	4661.55	0	0	23.24
2012-09-03	0	1296	56.01	893	335.98	5357.81	0	0	485.34
2012-10-30	0	629.99	90.93	133.95	352.77	3019.16	0	0	499.34
2012-12-11	0	307.26	22.39	222.22	806.32	392.29	0	0	318.58
2013-02-11	0	153	0	1146.02	604.74	350.69	0	0	0
2013-02-26	0	25.41	0	1442.82	505.97	185.14	0	0	4.38
2013-03-26	0	556.9	247.51	3091.79	853.84	1313.72	0	0	0
2013-04-08	0	149.18	116.03	3749.57	631.1	1833.51	0	0	0
2013-04-24	0	462.83	263.99	2126.23	729.52	1500.08	0	0	5.33
2013-05-27	0	136	186.67	1561.05	179.15	897.64	0	0	0
2013-06-10	0	8.48	118.59	5139.22	1264.81	4885.66	0	0	8.36
2013-06-25	0	189	378	5282.1	2385.2	5414.26	0	0	3.39
2013-07-09	0	52.35	106.89	1493.72	1209.48	3576.82	0	0	0
2013-07-22	0	10.61	8.25	2738.38	460.76	3618.06	0	0	0
2013-09-23	0	729.59	321.07	571.52	179.15	903.23	0	0	154.31
2013-10-07	0	10.42	136	1020.57	326.36	1700.9	0	0	340.66
2013-11-18	0	0	573.99	863.22	67.18	3506.88	0	0	382.66
2013-12-03	0	180	63	461.38	16.8	179.62	0	0	242.67
