# Supplementary material for: Seasonal Variations in the Biodiversity, Ecological Strategy, and Specialization of Diatoms and Copepods in a Coastal System With Phaeocystis Blooms: The Key Role of Trait Trade-Offs
Source: Frontiers journal article supplement (doi:10.3389/fmars.2021.656300), 2021-09-06
Supplement: Data_Sheet_8.xlsx [file Data_Sheet_8.xlsx]

## Sheet: copepod.traits
	Feeding.mode	Carnivory	Herbivory	Detritivory	Omnivory	Max.size
Acartia.clausi	0.5	0.125	0.75	0.125	0.609374	1.47
Calanus.helgolandicus	1	0.125	0.75	0.125	0.609374	3.5
Paracalanus.parvus	1	0.125	0.75	0.125	0.609374	1.4
Pseudocalanus.elongatus	1	0.125	0.75	0.125	0.609374	1.77
Temora.longicornis	1	0.125	0.75	0.125	0.609374	1.66
Centropages.typicus	0.5	0.3333	0.3333	0.3333	1	2
Centropages.hamatus	0.5	0.3333	0.3333	0.3333	1	1.42
Oithona.nana	0	0.3333	0.3333	0.3333	1	0.95
Ditrichocorycaeus.anglicus	0	1	0	0	0	1.19
Euterpina.acutifrons	0	0.125	0.75	0.125	0.609374	0.86
