# Supplementary material for: Seasonal Variations in the Biodiversity, Ecological Strategy, and Specialization of Diatoms and Copepods in a Coastal System With Phaeocystis Blooms: The Key Role of Trait Trade-Offs
Source: Frontiers journal article supplement (doi:10.3389/fmars.2021.656300), 2021-09-06
Supplement: Data_Sheet_9.xlsx [file Data_Sheet_9.xlsx]

## Sheet: cops.ecological.specialization
	HT	POC	SPM	Chloa	Tol	TSItrophicregime	TSIfeedingmode
Acartia.clausi	18.037850	2485.763915	145.993557	14.021499	3.04	0.390626	0.5
Calanus.helgolandicus	17.381618	2812.134901	174.729363	6.253226	1.15	0.390629	1
Paracalanus.parvus	17.764478	3337.967168	193.216311	6.060557	0.71	0.390625	1
Pseudocalanus.elongatus	17.725453	2684.311247	155.622538	15.087848	3.36	0.390625	1
Temora.longicornis	16.648617	3223.935156	200.028511	12.850512	3.42	0.390625	1
Centropages.typicus	14.575948	3310.676601	181.456868	6.335651	0.64	0.001	0.5
Centropages.hamatus	17.555068	2487.851780	150.503599	14.206748	3.44	0.001	0.5
Oithona.nana	16.288710	2311.748452	132.514795	6.109762	1.34	0.001	1
Ditrichocorycaeus.anglicus	18.228082	2812.420401	160.917975	10.273665	1.64	1	1
Euterpina.acutifrons	17.063689	2883.723148	174.886821	12.194646	1.72	0.390625	1
