# Supplementary material for: Seasonal Variations in the Biodiversity, Ecological Strategy, and Specialization of Diatoms and Copepods in a Coastal System With Phaeocystis Blooms: The Key Role of Trait Trade-Offs
Source: Frontiers journal article supplement (doi:10.3389/fmars.2021.656300), 2021-09-06
Supplement: Table_1.xlsx [file Table_1.xlsx]

## Sheet: Feuil1
	Traits	Typea	Range/Category	Ecological process/Functional meaning	References
	Phytoplankton/diatoms
	Biovolume	Numerical (R and D)		The ‘master trait’ for resource acquisition,reproduction, and predator avoidance	Litchman and Klausmeier 2008
	S/V cell ratio	Numerical ( R)	0.02-4.62 µm-1	Competitive ability under nutrient limitation, silica requirement	Grover 1989, Karp-Boss et al. 1996, Musielak et al. 2009, Takabayashi et al. 2006, Leynaert et al. 2004, Lovecchio et al. 2019
	Coloniality	Ordinal (R and D)	0: No, 1: <5 cells, 2:[5-20], 3:]20, 100], 4:>100	Competitive ability under nutrient limitation	Grover 1989, Karp-Boss et al. 1996, Musielak et al. 2009, Takabayashi et al. 2006, Lovecchio et al. 2019, Bjærke et al. 2015
			0: <500; 1:>501 µm	vulnerability to predation	Djeghri et al. 2019
	Apparent degree of silicification	Ordinal (R and D)	1: Slightly, 2: Medium, 3: Heavily	Silica requirement, vulnerability to predation	Martin-Jézéquel et al., 2000; Martin-Jézéquel and Lopez, 2003, Pančić et al. 2019
	Tychopelagic/Benthic occurrence	Binary	0: Pelagic; 1: Tychopelagic/Benthic	Use of resources and habitat
	Maximum Linear Dimension (MLD)	Numerical (R and D)	3-447 µm	Cell buoyancy, vulnerability to photo-inhibition	Grover 1989, Key et al. 2010, Schwaderer et al. 2011, Naselli-Flores et al. 2020
				Capacity at capturing the fluctuating light and persisting in subsurface waters	Naselli-Flores et al 2020
	Defense	Ordinal (D)	0-4 (0: No defence, 4 many defence traits)b	Predator avoidance	Pancic and Kiørboe 2018
	Copepods
	Maximum size	Numerical (R and D)	1: ≤1 mm, 2: ]1; 2], and 3: >2 mm	Feeding, growth, reproduction, survival	Litchman et al. 2013
	Trophic regime	Fuzzy coded ( R)	Carnivory, Herbivory, Detritivory, Omnivoryc	Feeding, growth, reproduction, survival	Litchman et al. 2013
	Feeding mode	Ordinal (R and D)	0: Passive, 0.5: Mixed, 1: Active	Feeding, survival	Kiørboe 2011, Litchman et al. 2013
	a: R and D: Resource and Defence trait, respectively.
	b: see Table S3 and supplementary data
	c: see Chihoub et al. 2020 for more details
